# Supplementary material for: Genome annotation with long RNA reads reveals new patterns of gene expression and improves single-cell analyses in an ant brain
Source: PubMed Central journal article supplement (PMC8626913; doi:10.1186/s12915-021-01188-w), 2021-11-27

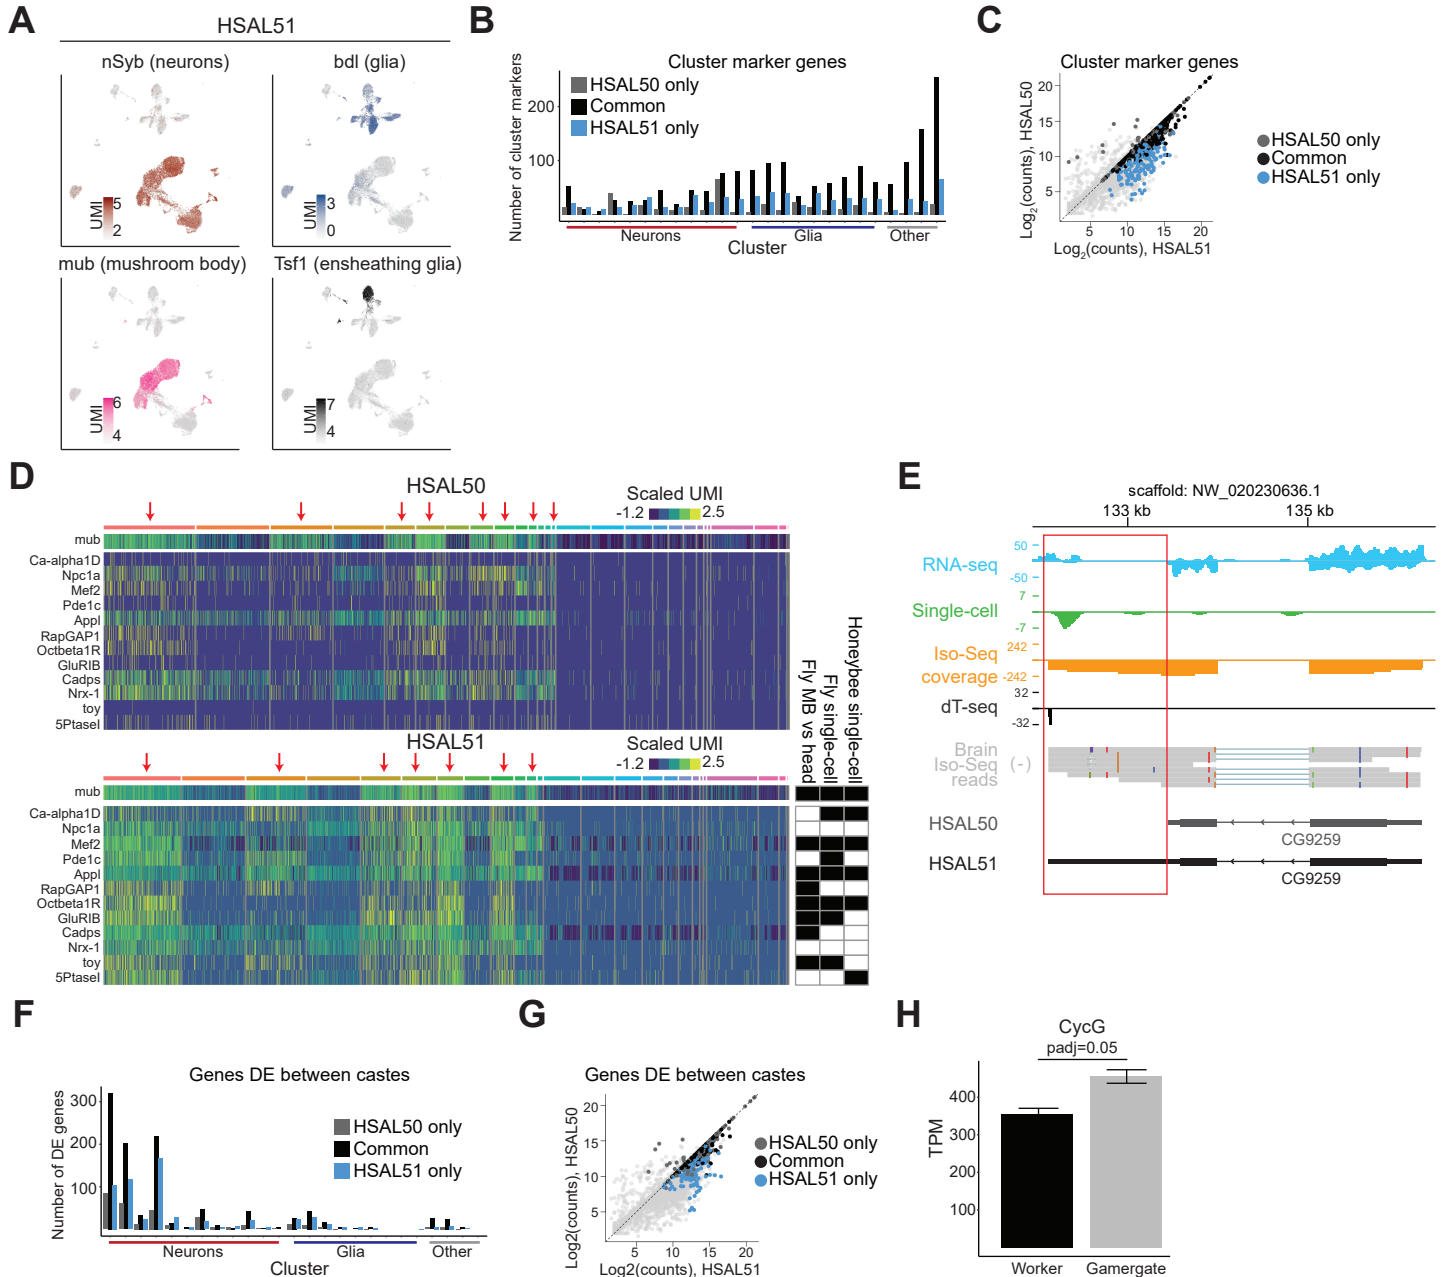

Supplement: 12915_2021_1188_MOESM5_ESM.pdf [file 12915_2021_1188_MOESM5_ESM.pdf]
